# Supplementary material for: Multiplex fluorophore systems on DNA with new diverse fluorescence properties and ability to sense the hybridization dynamics
Source: Royal Society of Chemistry journal article supplement (doi:10.1039/c4cc01378f), 2014-01-01
Supplement: c4cc01378f1.pdf [file c4cc01378f1.pdf]

## Supporting Information

### Multiplex Fluorophore Systems on DNA with New Diverse Fluorescence Properties and Ability to Sense Hybridization Dynamics

Dong Gyu Lee, In Sun Kim, Jung Woo Park, Byeang Hyeon Kim and Young Jun Seo \*

*Department of Chemistry, Chonbuk National University, Jeonju 561-756, South Korea*

RECEIVED DATE; yseo@jbnu.ac.kr

- S2 Experimental Methods
- S3 **Table S1** MALDI-TOF mass spectral data.
- S4 **Table S2** Oligonucleotide sequences and the structures of A<sup>py</sup> and U<sup>py</sup>.
- S4 **Figure S1** Normalized fluorescence spectra of (A) **ODN Sn**, (B) **ODN Hn**, (C) **ODN Sn:Hn duplex**.
- S5 **Figure S2** A) Absorption; and B) Fluorescence spectra for the A<sup>py</sup>, U<sup>pe</sup>, and Cy3<sup>TM</sup> fluorophores.
- S5 **Figure S3** Fluorescence spectra for all MFD sequences under different conditions.
- S6 **Figure S4** CD spectra for all MFD sequences in their i-motif and duplexed states.
- S7 **Figure S5** Fluorescence spectra for each MFD sequence.
- S7 **Figure S6** UV absorbance spectra for each MFD sequence.
- S8 **Figure S7** Absorption and fluorescence spectra of R1 sequence
- S8 **Figure S8** Circular Dichroism data of MFD 3 and MFD 6 depending on a Ph
- S8 **Figure S9** Melting temperature of MFD 3 and MFD 6 at pH 4.0
- S9 **Figure 10** Absorption and fluorescence spectra of m1, m2, and m3 sequence.

## **Experimental Methods**

### **Solid-phase oligonucleotide synthesis**

The phosphoramidite  $P^yA$  was introduced as a building block to produce fluorescent oligodeoxynucleotides (ODNs) on a controlled-pore glass (CPG) solid support, using a standard phosphoramidite approach and an automated DNA synthesizer (POLYGEN DNA-Synthesizer). For comparison, unmodified ODNs were also prepared. The synthesized oligonucleotides were cleaved from the solid support after treatment with 30% aqueous  $NH_4OH$  (1.0 mL) for 10 h at 55 °C. The crude products from the automated ODN syntheses were lyophilized and diluted with distilled water (1 mL). The ODNs were purified using high-performance liquid chromatography (HPLC; Merck LichoCART C18 column; 10 × 250 mm; 10  $\mu$ m; pore size: 100 Å). The HPLC mobile phase was isocratic for 10 min (5% MeCN/0.1 M triethylammonium acetate (TEAA) (pH 7.0)) at 2.5 mL/min. The gradient was linearly increased over 10 min from 5 to 50% MeCN/0.1 M TEAA at the same flow rate. The fractions containing the purified ODN were cooled and lyophilized. Subsequently, 80% aqueous AcOH was added to the ODN. After 1 h at ambient temperature, the AcOH was evaporated under reduced pressure. The residue was diluted with water (1 mL); this solution was purified via HPLC using the same conditions as described above. All ODNs were characterized using MALDI-TOF mass spectrometry.

### **DNA sample preparation for fluorescence and UV spectroscopy experiments**

The fluorescence emission spectra for the ODNs were collected with a 368 nm excitation at 20 °C using a quartz cuvette (path length: 1 cm) on a Varian Cary Eclipse spectrometer. The UV spectra were recorded using a Cary 100 Conc UV-Vis spectrophotometer (Varian) and a quartz cell (path length: 1 cm).

### **Circular dichroism (CD) measurements**

The CD spectra of the ODNs were recorded using a JASCO J-810 spectropolarimeter equipped with a temperature controller. For each sample, five spectral scans were accumulated over wavelengths from 225 to 325 nm at 20 °C. The samples for each ODN were prepared at 0.1  $\mu$ M in 100 mM Tris-HCl buffer with different pH values.

**Table S1** MALDI-TOF mass spectral data.

---

| <i>Sequence</i> | <i>Calcd. (m/z)</i> | <i>Found (m/z)</i> |
|-----------------|---------------------|--------------------|
| <i>MFD1</i>     | 5586                | 5587               |
| <i>MFD2</i>     | 6038                | 6038               |
| <i>MFD3</i>     | 6038                | 6043               |
| <i>MFD4</i>     | 6314                | 6314               |
| <i>MFD5</i>     | 5837                | 5837               |
| <i>MFD6</i>     | 6264                | 6263               |
| <i>MFD7</i>     | 5807                | 5808               |
| <i>MFD8</i>     | 6033                | 6035               |
| <i>MFD9</i>     | 6033                | 6034               |
| <i>MFD10</i>    | 6234                | 6234               |

---

**Table S2** Oligonucleotide sequences and the structures of **A<sup>py</sup>** and **U<sup>py</sup>**

|           |      |                       |                         |                                      |     |                                     |                         |
|-----------|------|-----------------------|-------------------------|--------------------------------------|-----|-------------------------------------|-------------------------|
| <b>S1</b> | 5'd- | <b>U<sup>py</sup></b> | <b>CA<sup>py</sup>T</b> | TCA                                  | GAG | TGT                                 | CCA                     |
| <b>S2</b> | 5'd- | <b>U<sup>py</sup></b> | <b>CA<sup>py</sup>T</b> | <b>U<sup>py</sup>CA</b>              | GAG | TGT                                 | CCA                     |
| <b>S3</b> | 5'd- | <b>U<sup>py</sup></b> | <b>CA<sup>py</sup>T</b> | <b>U<sup>py</sup>CA<sup>py</sup></b> | GAG | TGT                                 | CCA                     |
| <b>H1</b> | 5'd- |                       | TGG                     | ACA                                  | CTC | TGA                                 | <b>AU<sup>py</sup>G</b> |
| <b>H2</b> | 5'd- |                       | TGG                     | ACA                                  | CTC | <b>TGA<sup>py</sup></b>             | <b>AU<sup>py</sup>G</b> |
| <b>H3</b> | 5'd- |                       | TGG                     | ACA                                  | CTC | <b>U<sup>py</sup>G<sup>py</sup></b> | <b>AU<sup>py</sup>G</b> |

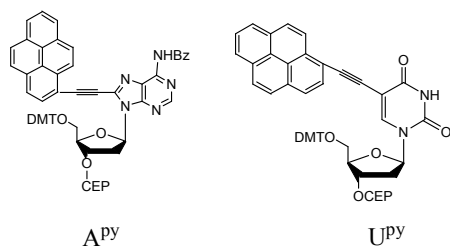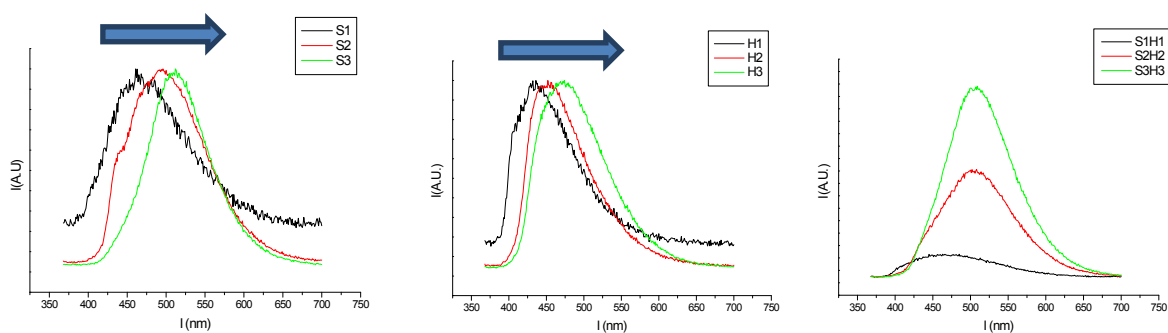

**Figure S1** Normalized fluorescence spectra of (A) **ODN Sn**, (B) **ODN Hn**. (C) Fluorescence spectra of **ODN Sn:Hn** duplex, All DNA samples were prepared at 1.0  $\mu$ M in 100 mM Tris-HCl buffer at 20 °C; fluorescence emission spectra were recorded with a 386 nm excitation.

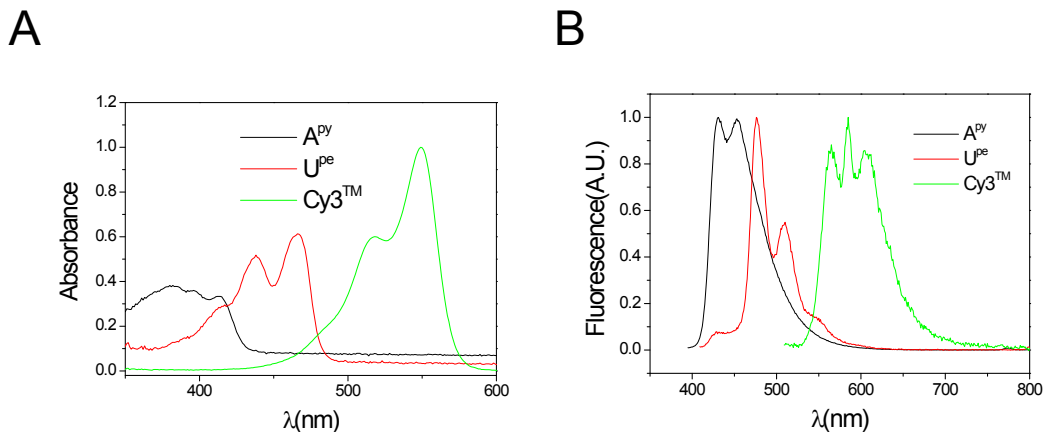

**Figure S2** A. Normalized absorption and B. Normalized fluorescence spectra for the A<sup>py</sup>, U<sup>pe</sup>, and Cy3<sup>TM</sup> fluorophores. All fluorophores were prepared in 1 μM solutions at 20 °C; the fluorescence emission spectra were recorded with a 386 nm excitation.

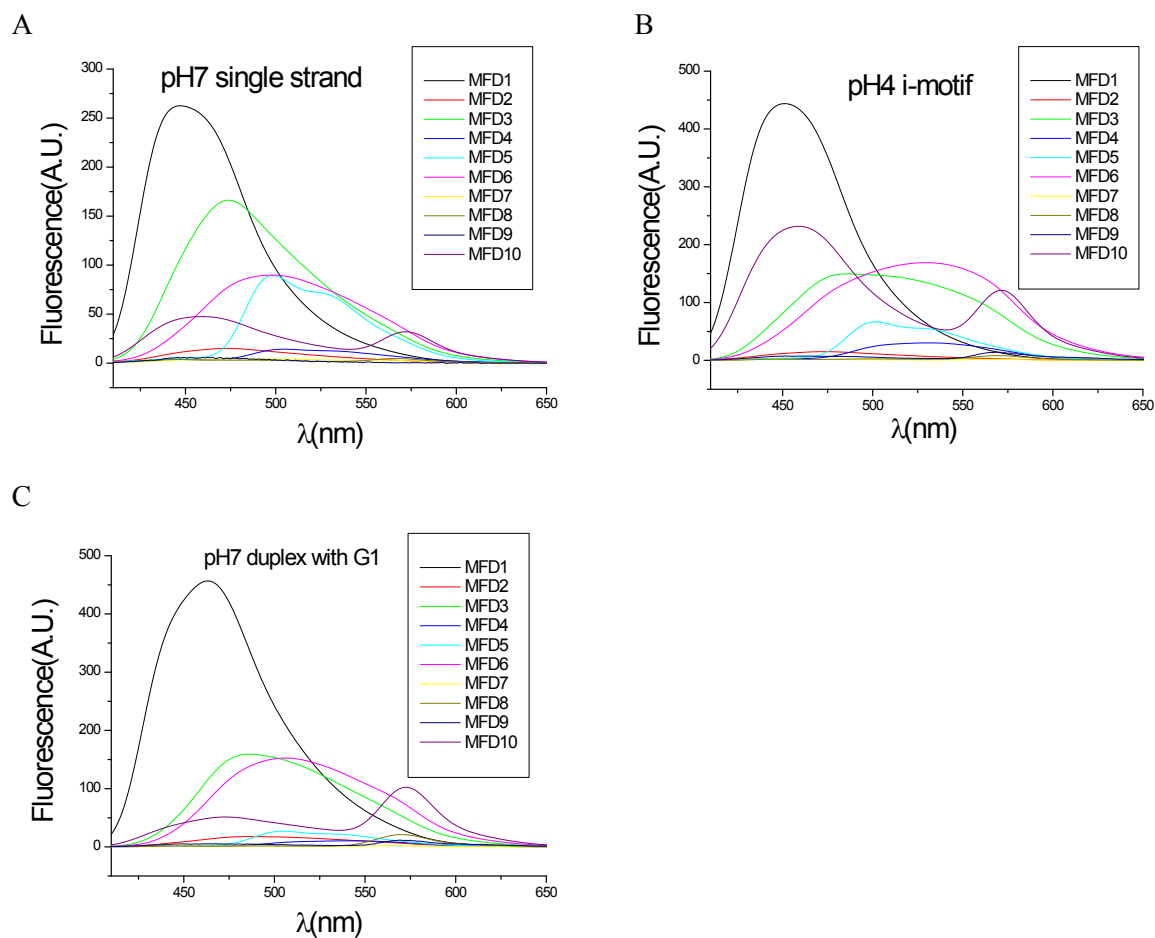

**Figure S3** (A–C) Fluorescence spectra for all (A) single stranded ODNs (MFD1–MFD10) at pH 7, (B) i-motif structures of the ODNs (MFD1–MFD10) at pH 4, (C) duplexes with the G-quadruplex sequences of the ODNs (MFD1–MFD10) at pH 4. All DNA samples were prepared at 0.1 μM in 100 mM Tris-HCl buffer at 20 °C.

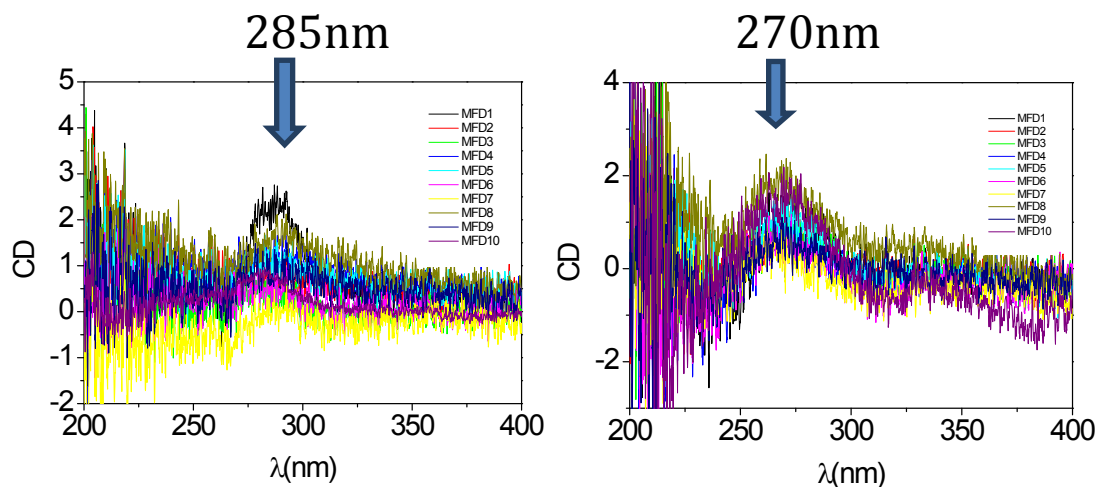

**Figure S4** CD spectra of all (A) the i-motif structures of the ODNs (**MFD1-MFD10**) at pH 4 and (B) duplexes with the G-quadruplex sequences of the ODNs (**MFD1-MFD10**) at pH 4. All DNA samples were prepared at 0.1  $\mu\text{M}$  in 100 mM Tris-HCl buffer at 20  $^{\circ}\text{C}$ .

1.

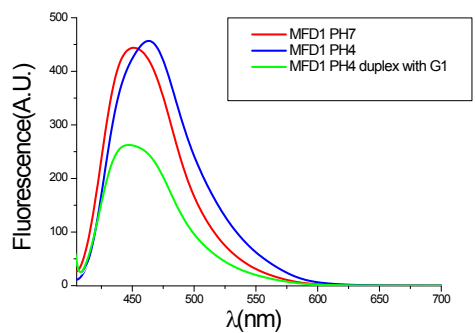

2.

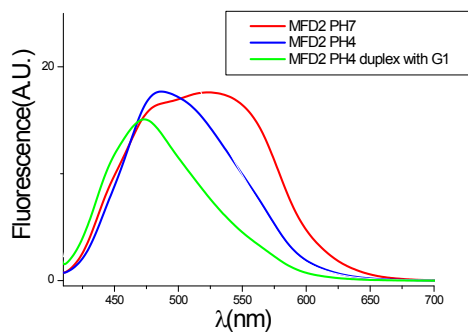

3.

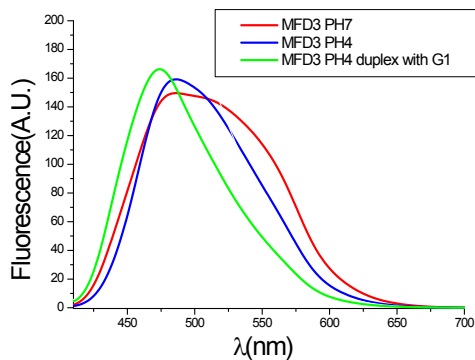

4.

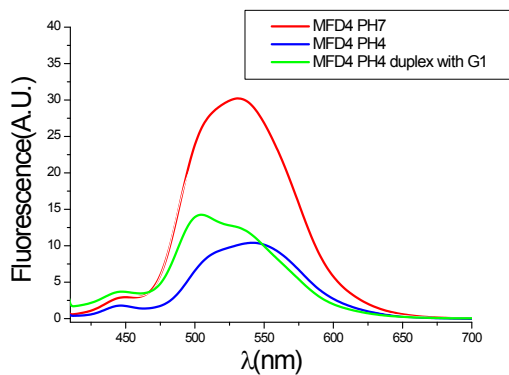

5.

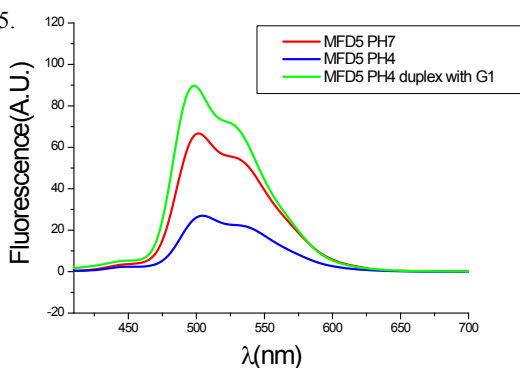

6.

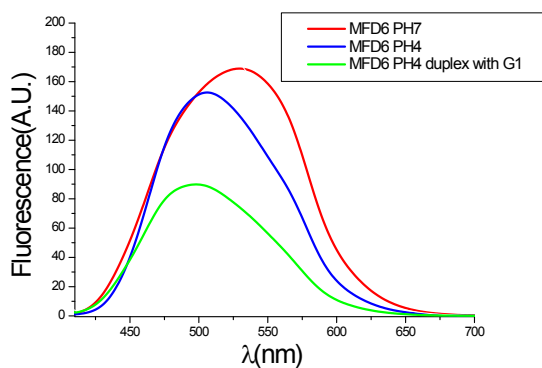

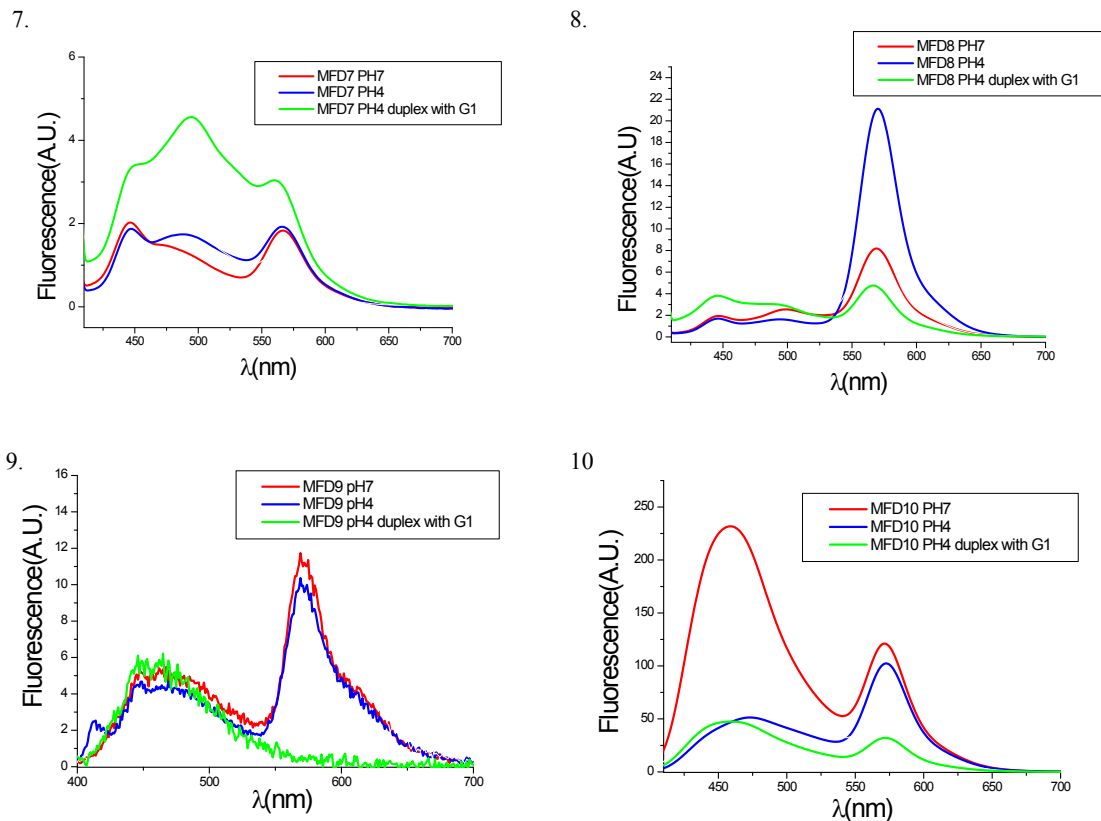

**Figure S5** Fluorescence spectra for each MFD sequences (MFD1-MFD10). All DNA samples were prepared at 0.1  $\mu$ M in 100 mM Tris-HCl buffer at 20  $^{\circ}$ C.

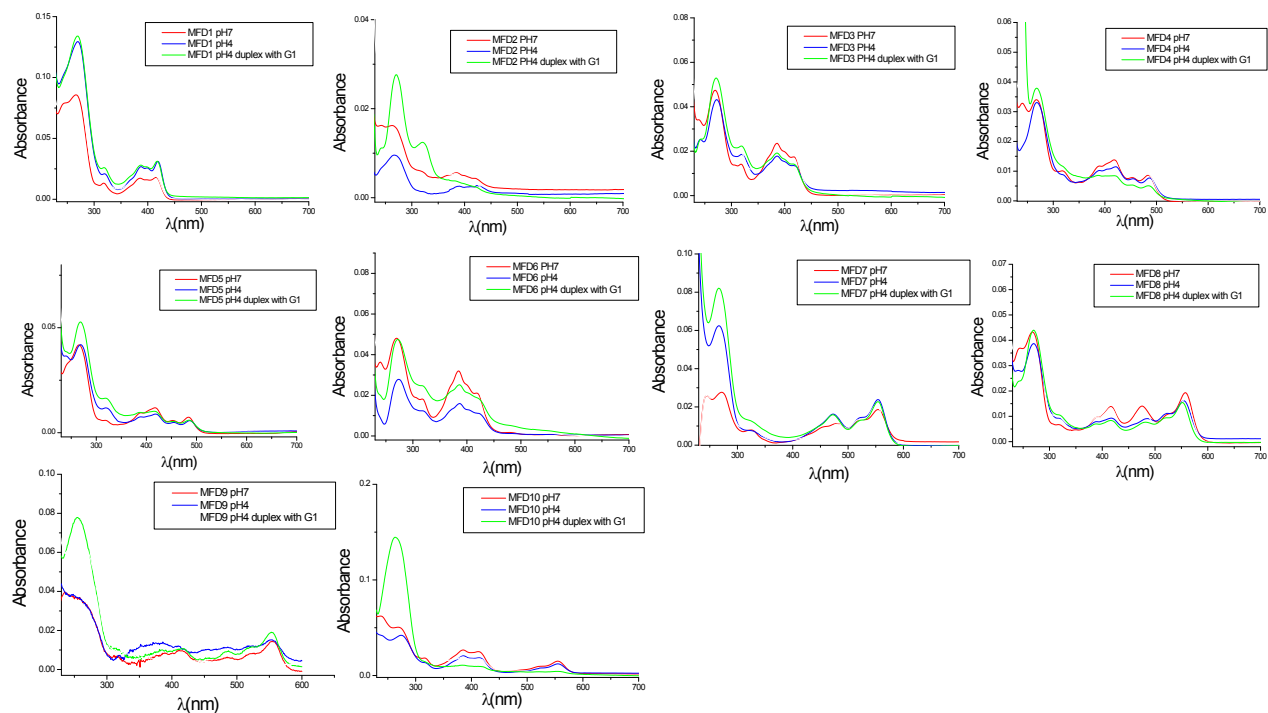

**Figure S6.** UV absorbance spectra for each MFD sequences (MFD1-MFD10). All DNA samples were prepared at 0.1  $\mu$ M in 100 mM Tris-HCl buffer at 20  $^{\circ}$ C.

Designed sequence: R1 5'-A<sup>py</sup>U<sup>pc</sup>Cy3<sup>TM</sup>A AAA

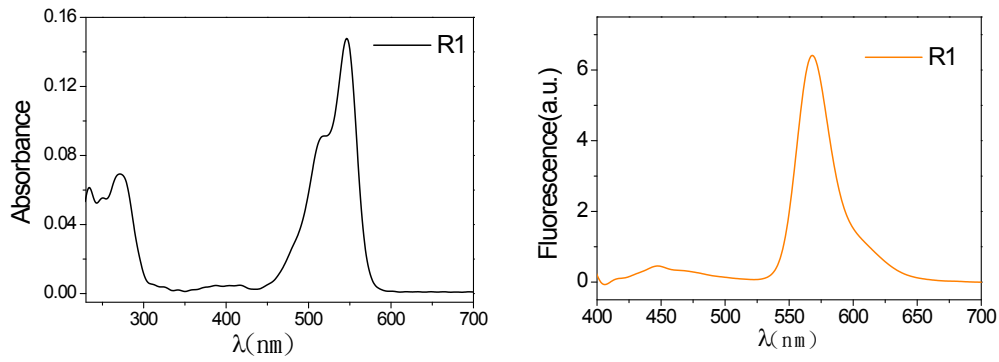

Figure S7) Absorption and fluorescence spectra of R1 sequence. DNA sample was prepared at 0.5 μM in 100 mM Tris-HCl buffer at 20 °C. The fluorescence spectrum was recorded with an excitation at 386 nm.

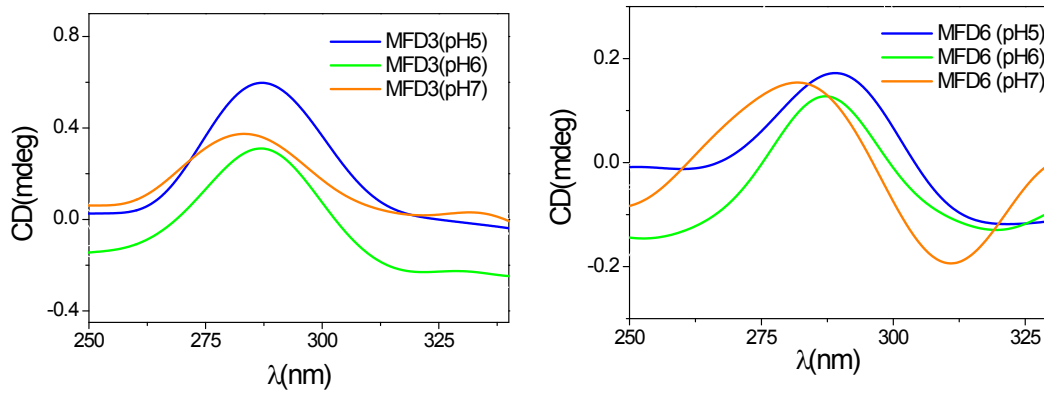

Figure S8) Circular Dichroism data of MFD 3 and MFD 6 depending on a pH. DNA samples were prepared at 0.5 μM in 100 mM Tris-HCl buffer at 20 °C.

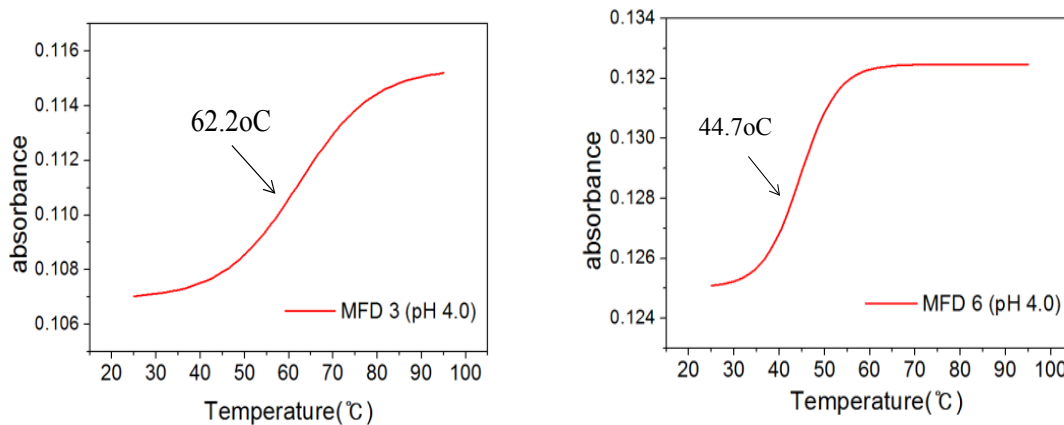

Figure S9) Melting temperature of MFD 3 and MFD 6 at pH 4.0. All ODN samples were prepared at a concentration of 0.5μM in 100 mM Tris-HCl buffer and irradiated at 260 nm.

Designed sequences



m1 5'-A<sup>py</sup>A<sup>py</sup>U<sup>T</sup>-GCU GAG AAG TTA GAA CCT ATG CTC AGC-E  
 m2 5'-A<sup>py</sup>U<sup>F</sup>U<sup>T</sup>-GCU GAG AAG TTA GAA CCT ATG CTC AGC-E  
 m3 5'-U<sup>F</sup>U<sup>T</sup>A<sup>py</sup>-GCU GAG AAG TTA GAA CCT ATG CTC AGC-E

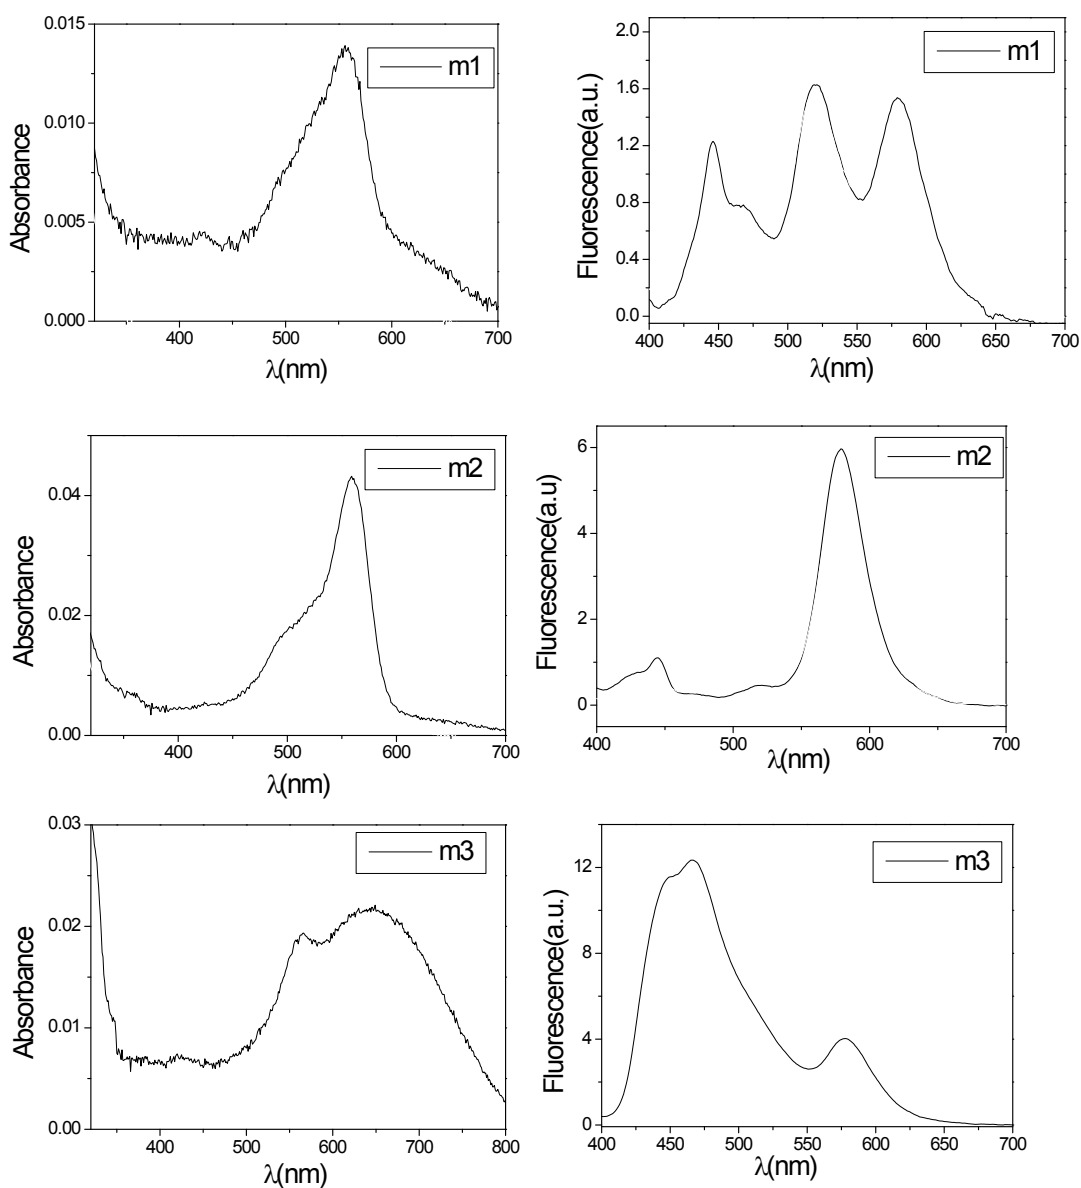

**Figure 10) Absorption and fluorescence spectra of m1, m2, and m3 sequence. DNA sample was prepared at 0.5  $\mu$ M in 100 mM Tris-HCl buffer at 20  $^{\circ}$ C. The fluorescence spectrum was recorded with an excitation at 386 nm. U<sup>T</sup>: Tamra attached deoxyuridine, U<sup>F</sup>: Fluorescein attached deoxy uridine at 5 position.**
